# Supplementary material
Source: PubMed Central journal article supplement (PMC5373445)
Supplement: ASN.2016030337SupplementaryData.pdf [file ASN.2016030337SupplementaryData.pdf]

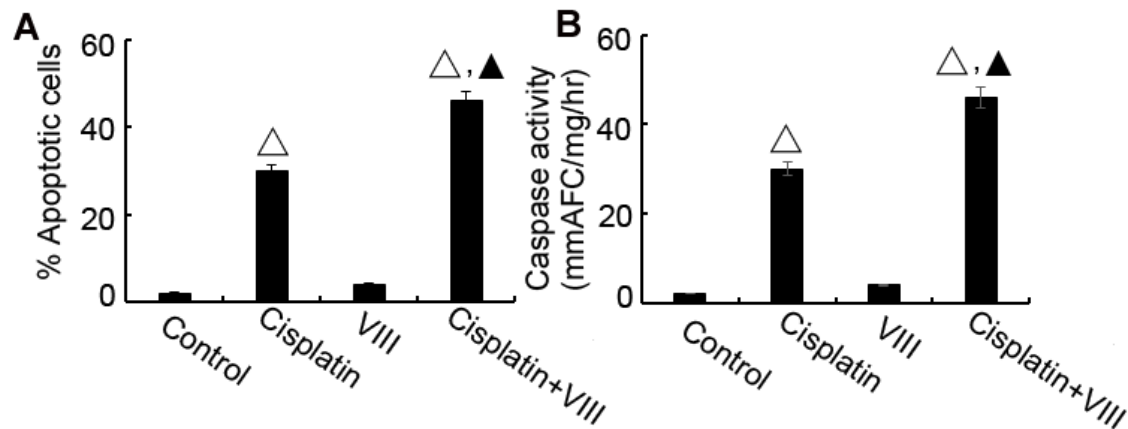

**Supplementary Figure 1.** Effect of VIII on cisplatin-induced apoptosis in RPTC. VIII was added during 16 h of cisplatin treatment of RPTC. (A) Cells were stained with Hoechst33342 to record cellular and nuclear morphology by phase-contrast and fluorescence microscopy to assess % of apoptosis. (B) Cell lysate was collected for enzymatic assay of caspase activity.  $\Delta$ , statistically significantly different from the control group ( $p < 0.05$ );  $\blacktriangle$ , statistically significantly different from cisplatin group ( $p < 0.05$ ). Data are representative of at least four separate experiments.

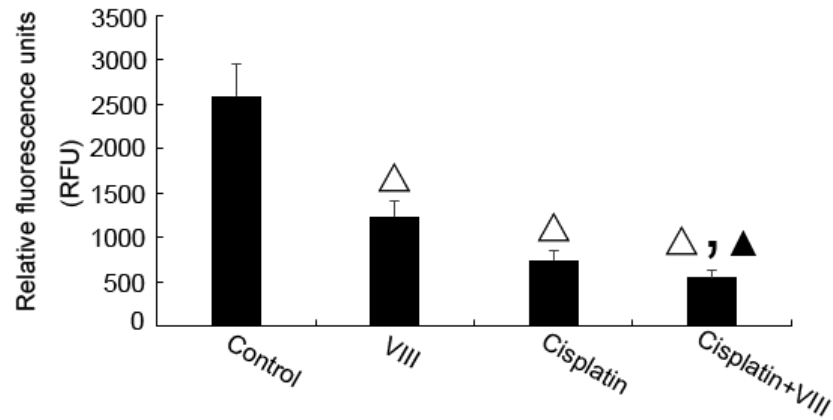

**Supplementary Figure 2.** Effect of VIII on cell proliferation. RPTC were treated with cisplatin for 24h with or without VIII, and then changed to fresh medium for another 24h. Cells were stained to determine cell proliferation using the Cyquant-NF cell proliferation assay kit. Δ, statistically significantly different from the control group ( $p < 0.05$ ); ▲, statistically significantly different from cisplatin group ( $p < 0.05$ ). Data are representative of at least four separate experiments.
